# Supplementary material for: Optogenetically controlled human functional motor endplate for testing botulinum neurotoxins
Source: PubMed Central journal article supplement (PMC8647380; doi:10.1186/s13287-021-02665-3), 2021-12-05

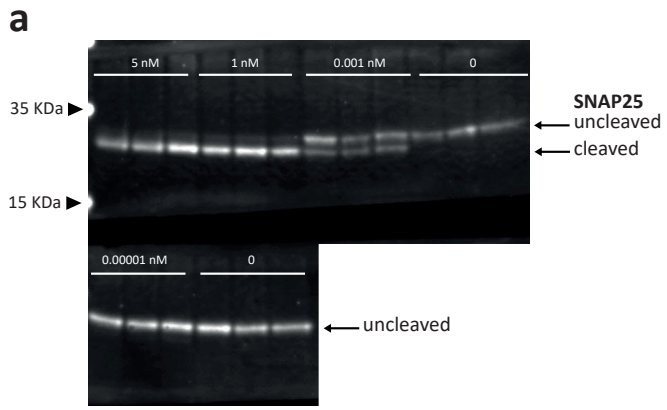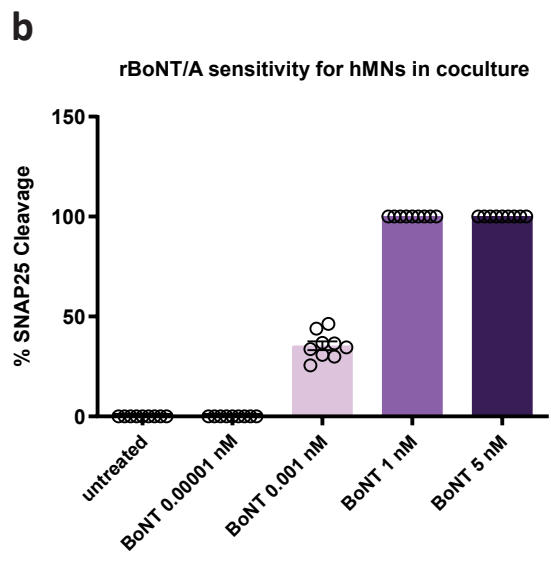

Supplement: 13287_2021_2665_MOESM4_ESM.pdf [file 13287_2021_2665_MOESM4_ESM.pdf]
