# Supplementary material for: Optogenetically controlled human functional motor endplate for testing botulinum neurotoxins
Source: PubMed Central journal article supplement (PMC8647380; doi:10.1186/s13287-021-02665-3), 2021-12-05
Supplement: 13287_2021_2665_MOESM6_ESM.pdf [file 13287_2021_2665_MOESM6_ESM.pdf]

**a**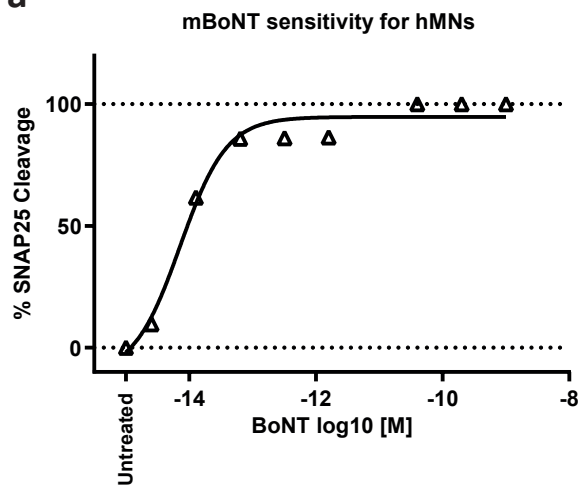**b**

| <i>mBoNT</i>          | hMNs in mono-culture |
|-----------------------|----------------------|
| Log EC <sub>50</sub>  | -14.14               |
| EC <sub>50</sub> [pM] | 0.01                 |
